# Supplementary material for: The lncRNA-GAS5/miR-221-3p/DKK2 Axis Modulates ABCB1-Mediated Adriamycin Resistance of Breast Cancer via the Wnt/β-Catenin Signaling Pathway
Source: PubMed Central journal article supplement — Mol Ther Nucleic Acids. 2020 Feb 1;19:1434–48. doi: 10.1016/j.omtn.2020.01.030 (PMC7056627; doi:10.1016/j.omtn.2020.01.030), 2020-02-01
Supplement: mmc1.pdf [file mmc1.pdf]

OMTN, Volume 19

## **Supplemental Information**

**The lncRNA-GAS5/miR-221-3p/DKK2 Axis**

**Modulates ABCB1-Mediated Adriamycin**

**Resistance of Breast Cancer via the Wnt/ $\beta$ -Catenin**

**Signaling Pathway**

**Zhaolin Chen, Tingting Pan, Duochen Jiang, Le Jin, Yadi Geng, Xiaojun Feng, Aizong Shen, and Lei Zhang**

Supplementary Table 1. The sequences of the synthetic primers

| Gene             | Forward primer(5'-3')     | Reverse primer(3'-5')   |
|------------------|---------------------------|-------------------------|
| GAPDH            | AGCAAGAGCACAAAGAGGAAG     | GGTTGAGCACAGGGTACTTT    |
| U6               | GCTTCGGCAGCACATATACTAAAAT | CGCTTCACGAATTTGCGTGTCAT |
| GAS5             | TGAGGTATGGTGCTGGGTGC      | AAGCTGGTCCAGGCAAGTTGG   |
| <i>MDR1</i>      | CCCATCATTGCATATGCAGG      | GTTCAAACCTTCTACTCCTGA   |
| DKK2             | AGTGTGAAGTTGGGAGGTATTGCC  | TGCCATTATTGCAGCGGGTACTG |
| $\beta$ -catenin | AAGACATCACTGAGCCTGCCAT    | CGATTTGCGGGACAAAGGGCAA  |
| c-Myc            | GTCAAGAGGCGAACACACAAC     | TTGGACGGACAGGATGTATGC   |
| CyclinD1         | TCAAGTGTGACCCGGACTGCCT    | GCACGTCGGTGGGTGTGCAA    |
